# Supplementary material
Source: publisher figshare collection journal article supplement (https://sage.figshare.com/ndownloader/files/15618995)
Supplement: Supplementary file 1 [file 15618995]

## Sheet: Tabelle1
Layer	Variables	Correlation (r) with Corylus %
Soil type	Bog	0.34
	Cambisol	0.11
	Chernozem	-0.24
	degraded fen deposit	-0.25
	fen	-0.17
	Gleysol	0.35
	Gleysol/Cambisol	0.069
	Luvisol	-0.21
	Podzol	-0.03
	poor Cambisol	-0.64 (p = 0.01)
	Stagnosol	0.63 (p = 0.01)
Parent material	coarse	-0.85 (p=0.00007)
	mostly coarse	-0.46
	mixed	0.45
	fine	0.76 (p = 0.001)
	peat	-0.14
